# Supplementary material for: Gene Expression Meta‐Analysis Reveals Concordance in Gene Activation, Pathway, and Cell‐Type Enrichment in Dermatomyositis Target Tissues
Source: PubMed Central journal article supplement — ACR Open Rheumatol. 2019 Nov 9;1(10):657–66. doi: 10.1002/acr2.11081 (PMC6917332; doi:10.1002/acr2.11081), 2019-11-09

## Supplementary Figure 1: PCA plots of gene expression data before and after cross-study normalization with ComBat

### A. Muscle before ComBat

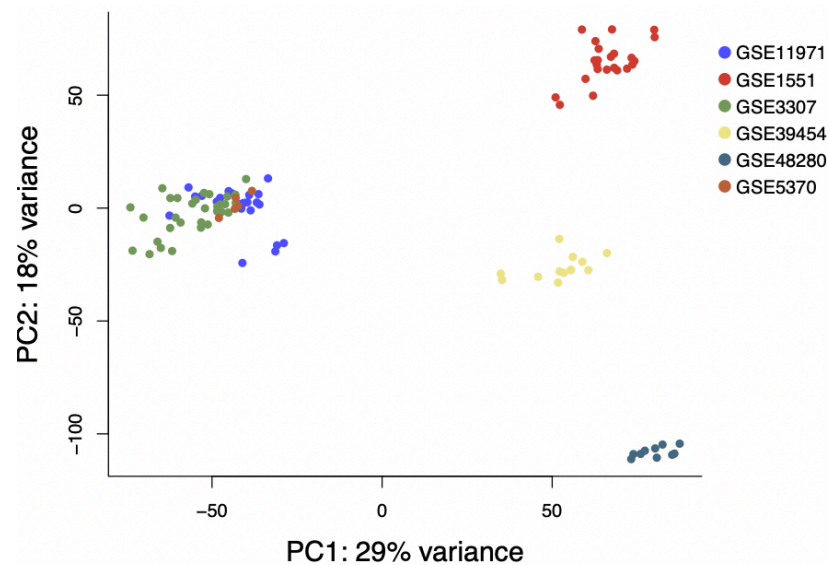

### B. Muscle after ComBat

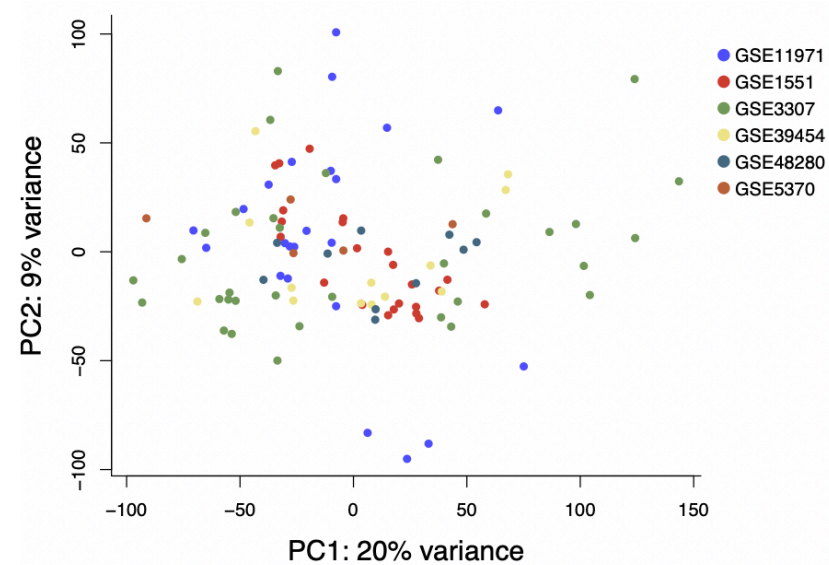

### C. Skin before ComBat

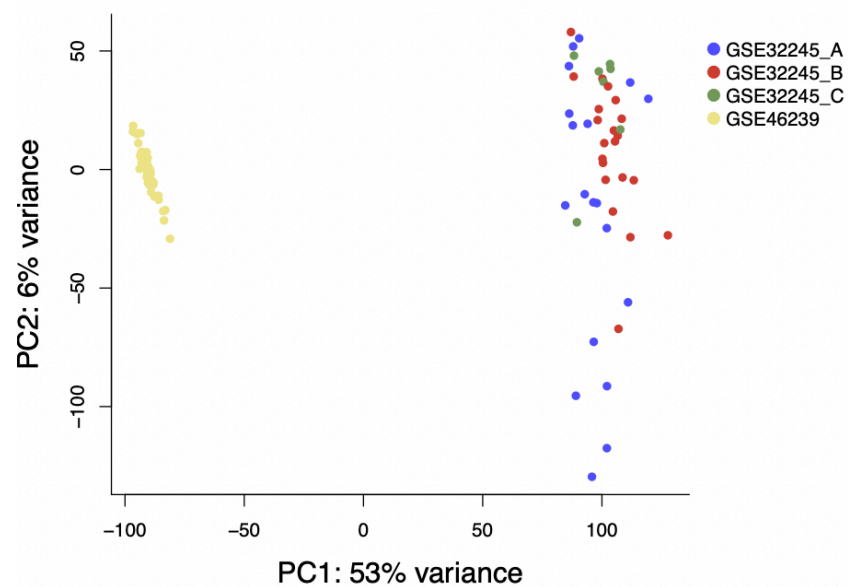

### D. Skin after ComBat

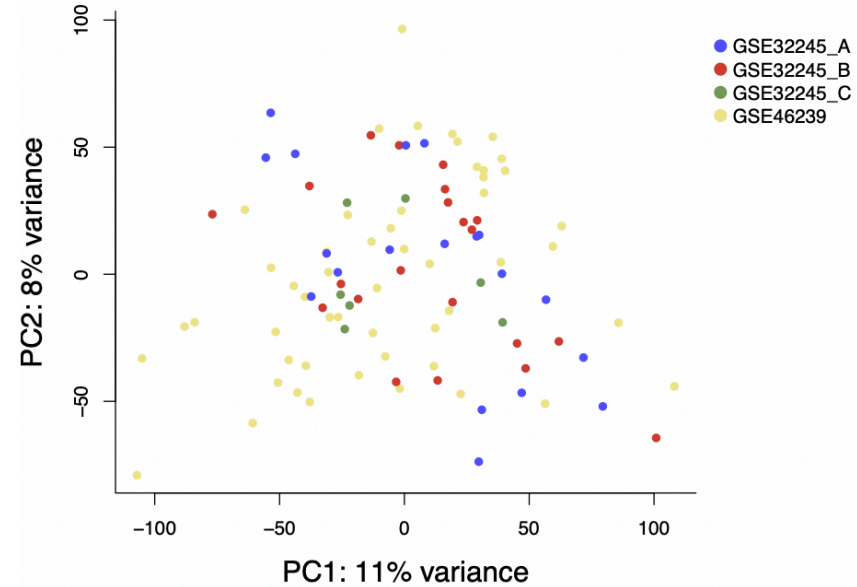

Supplement: ACR2-1-657-s001.pdf [file ACR2-1-657-s001.pdf]
